# Supplementary material
Source: Springer Nature journal article supplement (https://www.springermedizin.de/resource/supplementary/12885_2011_2971_MOESM6_ESM.pdf/9462352)
Supplement: MOESM6 [file 9462352]

Control

100  $\mu$ M150  $\mu$ M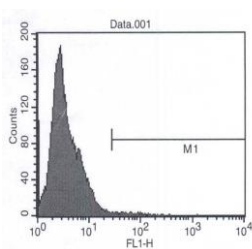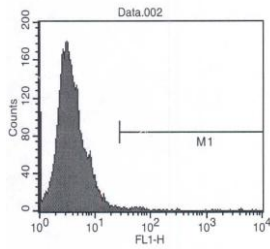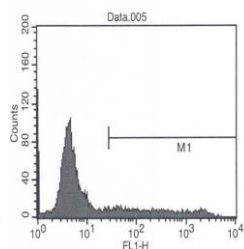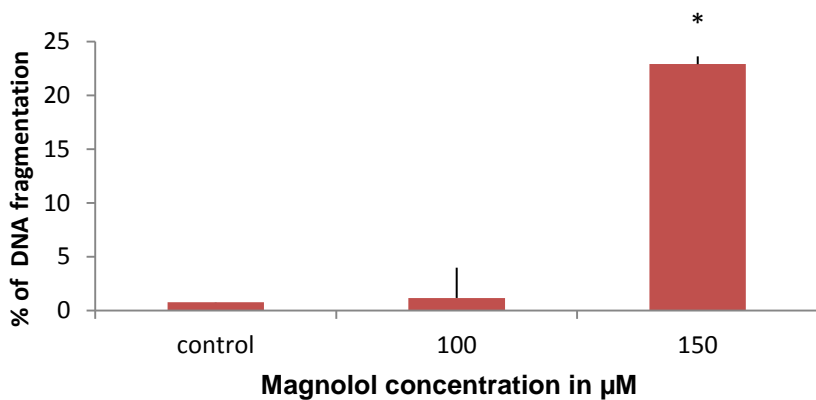

24 h

48 h

Control 75 100 125 Control 75 100 125 Magnolol concentration in  $\mu$ M

1 0.2 1.05 0.65 1 7.2 10.7 7.8

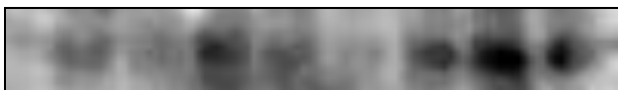

Cleaved caspase-8

1 0.42 1.8 6 1 4.4 4.8 27.1

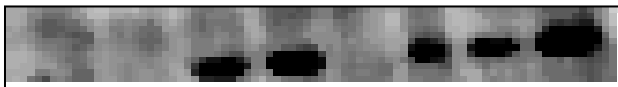

Cleaved caspase-3

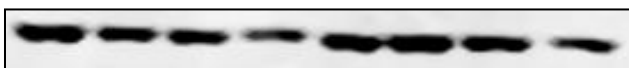 $\beta$ - Actin

1 8 4.7 5.8 1 0.6 0.3 0.55

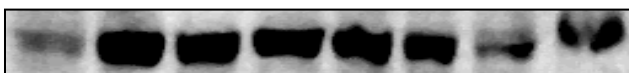

Cleaved PARP

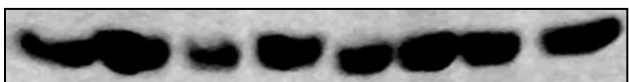 $\beta$ - Actin
